# Supplementary material for: Executive functions as mediators between socioeconomic status and academic performance in Chinese school-aged children
Source: PubMed Central journal article supplement — Heliyon. 2022 Oct 19;8(10):e11121. doi: 10.1016/j.heliyon.2022.e11121 (PMC9626878; doi:10.1016/j.heliyon.2022.e11121), 2022-10-19
Supplement: mmc1.pdf [file mmc1.pdf]

## Parent Questionnaire

### Background Information

For our research purposes, please answer the questions below (Please put a “tick” in the appropriate box or fill in the relevant information).

1. Date of filling out this form: \_\_\_\_\_ (day) \_\_\_\_\_ (month) \_\_\_\_\_ (year)
2. Your relationship with child: \_\_\_\_\_
3. Your child’s school name: \_\_\_\_\_
4. Your child’s class: Primary School \_\_\_\_\_
5. Your child’s class number: \_\_\_\_\_
6. Your child’s gender:      Male      Female
7. Your child’s date of birth: \_\_\_\_\_ (day) \_\_\_\_\_ (month) \_\_\_\_\_ (year)
8. Marital status:  
 Single    Married    Divorced    Widowed
9. Father’s educational level:  
 Primary school    Secondary school    College or university    Master’s degree or above
10. Mother’s educational level  
 Primary school    Secondary school    College or university    Master’s degree or above
11. Total family assets: HK\$ \_\_\_\_\_
12. Total family’s monthly expenditure: HK\$ \_\_\_\_\_

## Teacher Questionnaire

For our research purposes, please answer the questions below (Please put a “tick” in the appropriate box or fill in the relevant information).

1. Date of filling out this form: \_\_\_\_\_ (day) \_\_\_\_\_ (month) \_\_\_\_\_ (year)
2. Your student’s class: Primary School \_\_\_\_\_
3. Your student’s class number: \_\_\_\_\_
4. Your student’s achievement in Chinese subject:  
 Bottom 20%     21%–40%     41–60%     61–80%     Top 20%
5. Your student’s achievement in English subject:  
 Bottom 20%     21%–40%     41–60%     61–80%     Top 20%
6. Your student’s achievement in Mathematics subject:  
 Bottom 20%     21%–40%     41–60%     61–80%     Top 20%
